# Supplementary material
Source: PubMed Central journal article supplement (PMC6732764)
Supplement: ao9b01640_si_001.pdf [file ao9b01640_si_001.pdf]

## Supporting information

### **Magnetic Lignosulfonate-Supported Pd Complex: Renewable Resource-Derived Catalyst for Aqueous Suzuki–Miyaura Reaction**

**Mahmoud Nasrollahzadeh<sup>\*,†</sup> Zahra Issaabadi<sup>†</sup> and Rajender S. Varma<sup>\*,‡</sup>**

*<sup>†</sup>Department of Chemistry, Faculty of Science, University of Qom, Qom 3716146611, Iran. E-mail: mahmoudnasr81@gmail.com; Fax: +98 25 32103595; Tel: +98 25 32850953*

*<sup>‡</sup>Regional Centre of Advanced Technologies and Materials, Department of Physical Chemistry, Faculty of Science, Palacky University, Šlechtitelů 27, 783 71 Olomouc, Czech Republic. E-mails: rajvarma@hotmail.com; Varma.Rajender@epa.gov; Fax: +1 (513)-569-7677; Tel.: +1 (513)-487-2701*

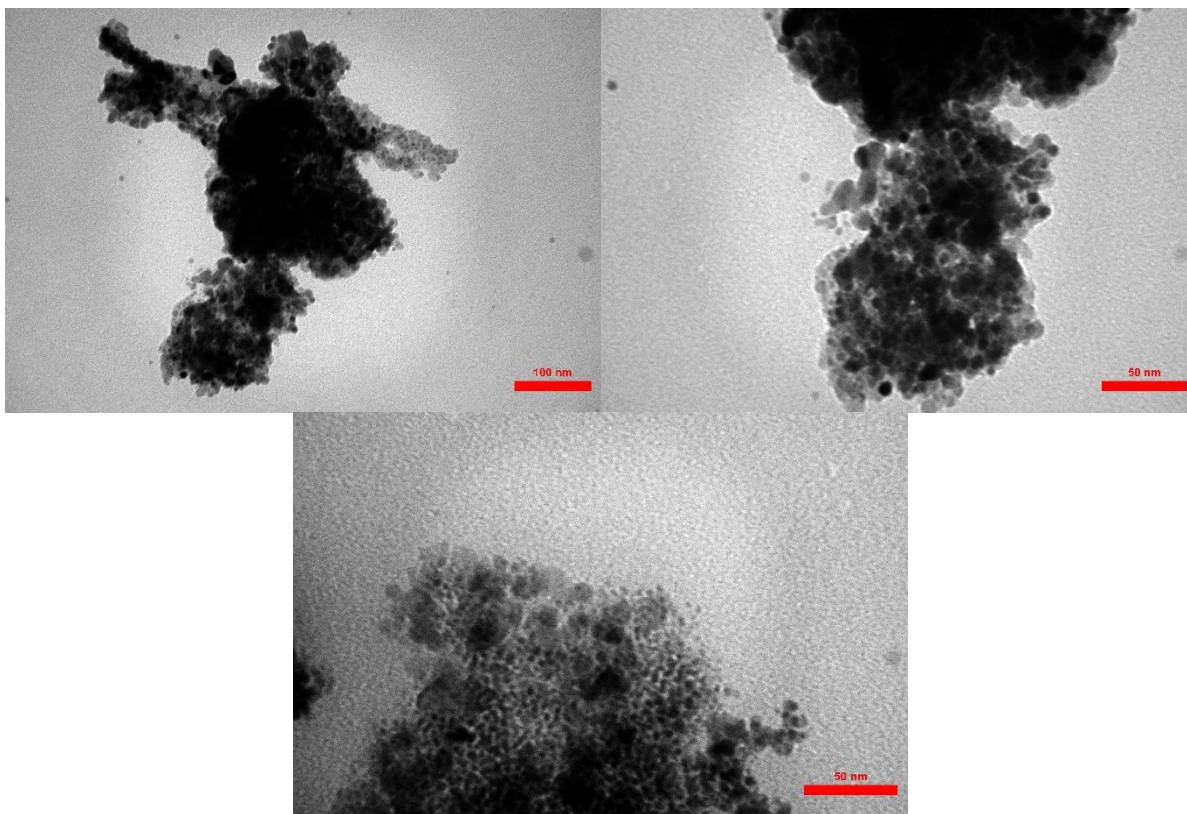

**Figure S1.** TEM images of recovered FLA-Pd.

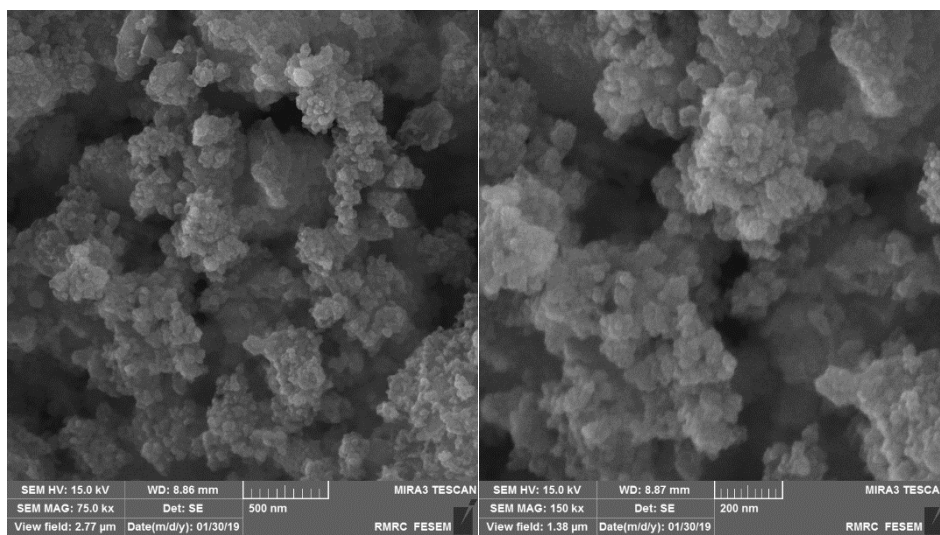

**Figure S2.** FESEM images of recovered FLA-Pd.
